# Supplementary material
Source: PubMed Central journal article supplement (PMC3706204)

# **SI. Figure S1. HDX Kinetic Curves for All Peptides**

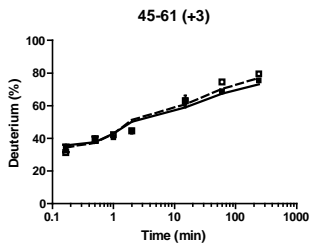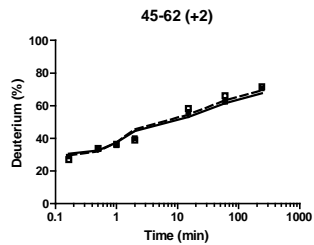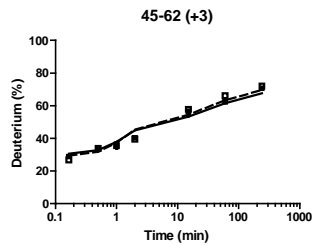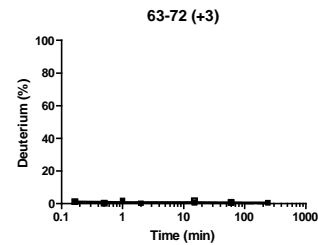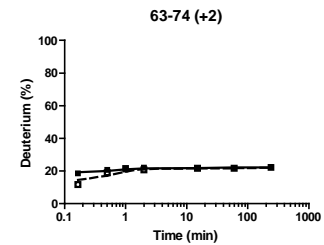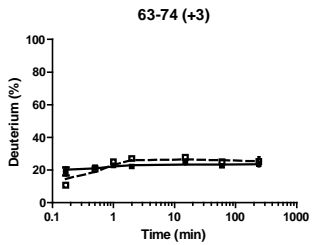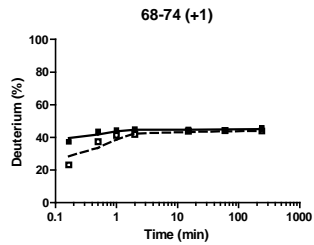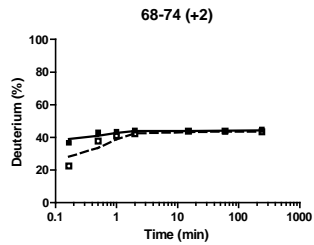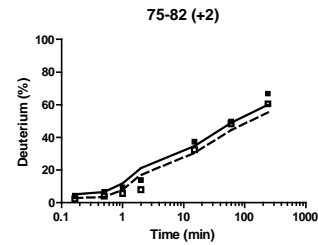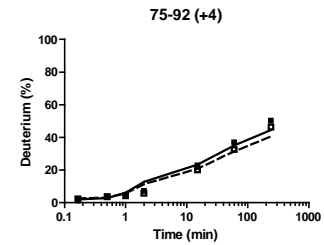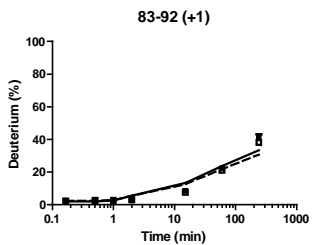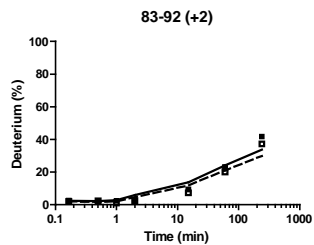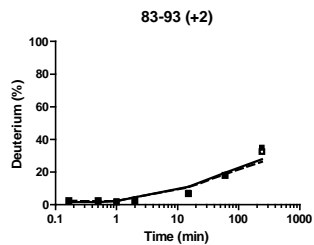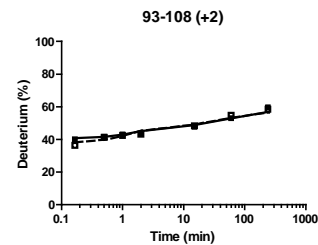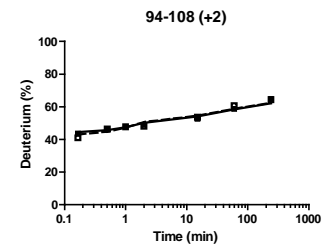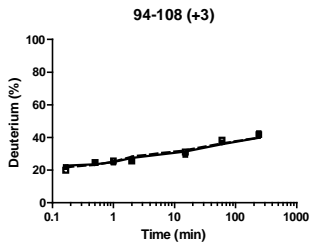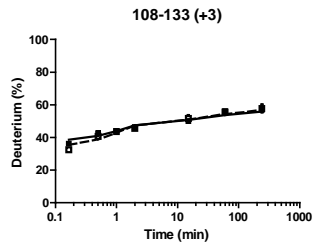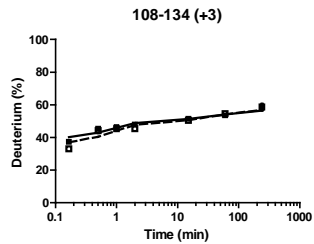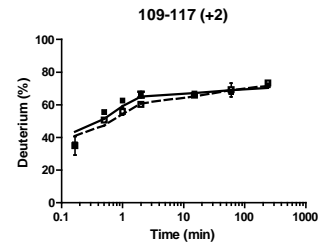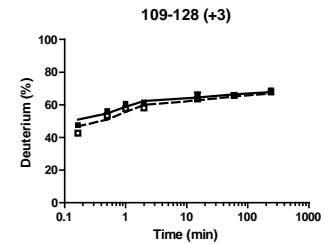

■ Apo

■ E3330 bound

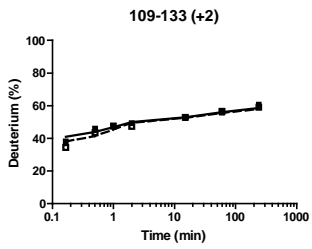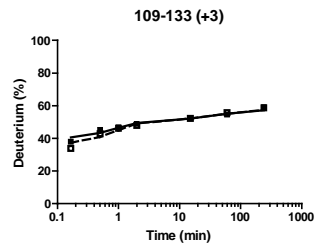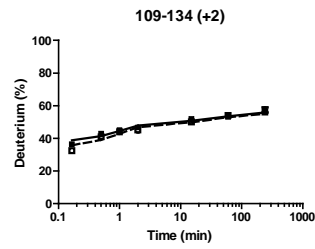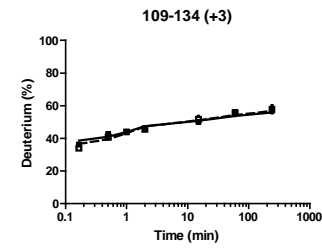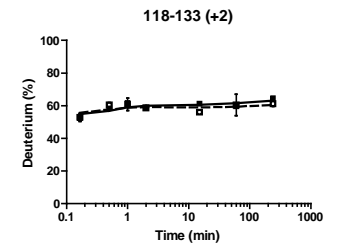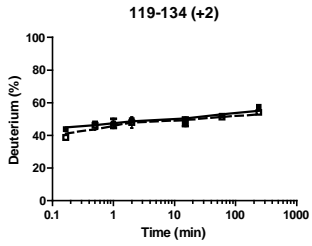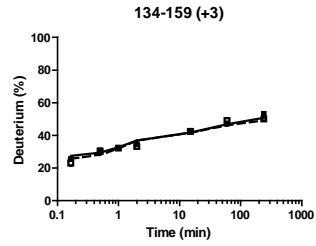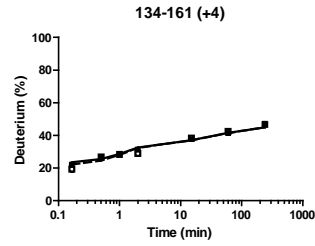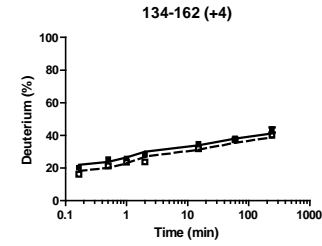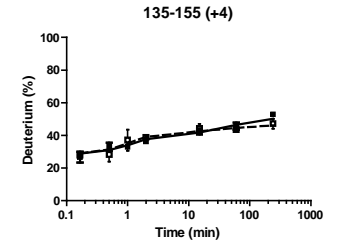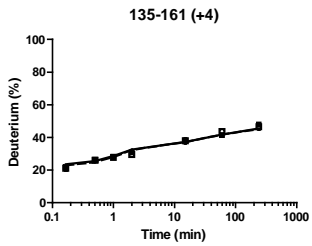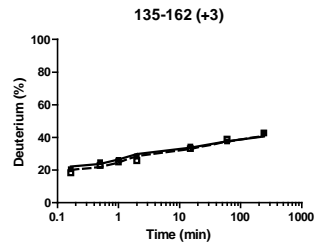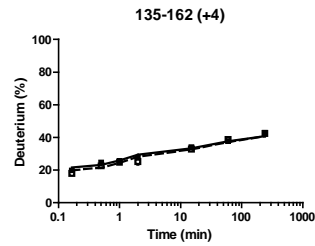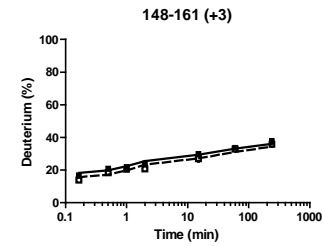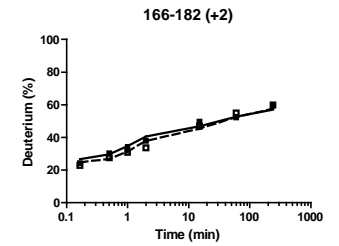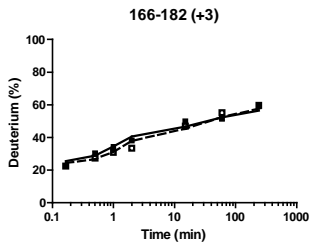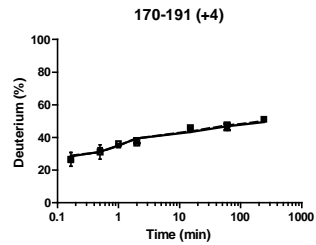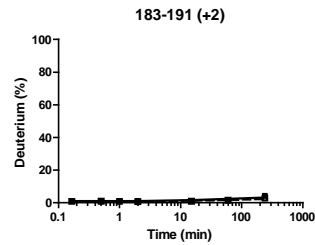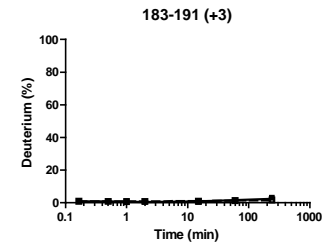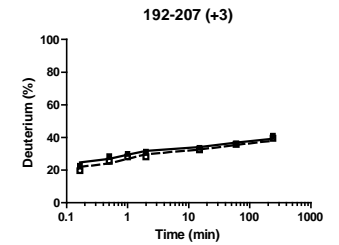

■ Apo      ■ E3330 bound

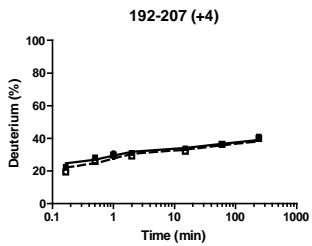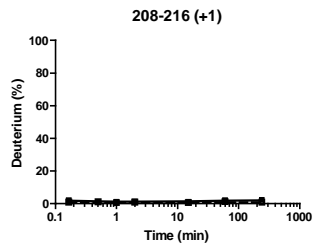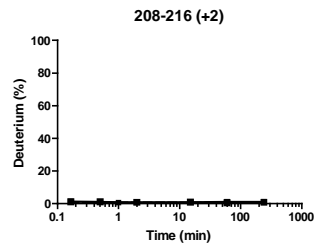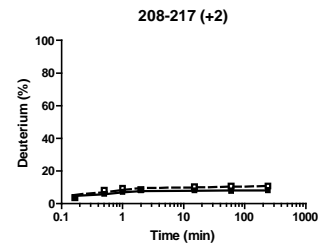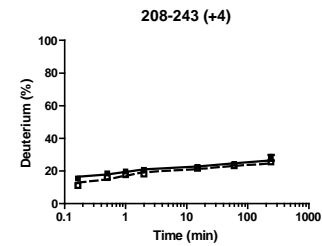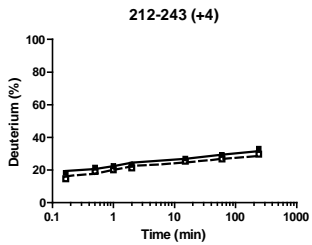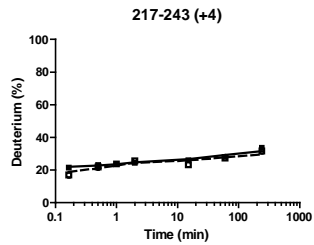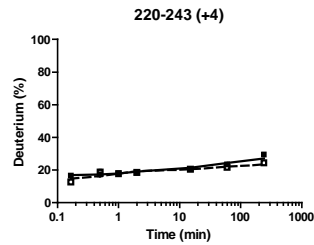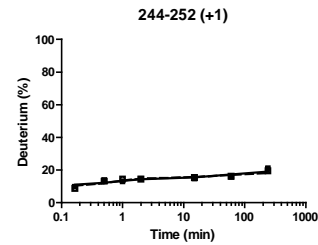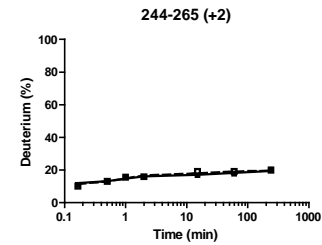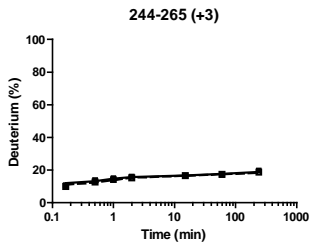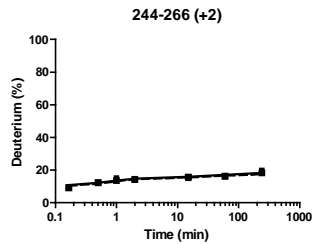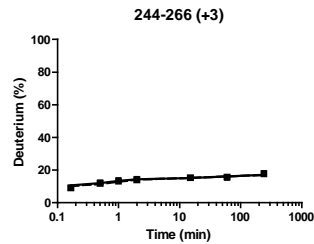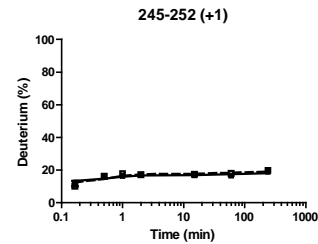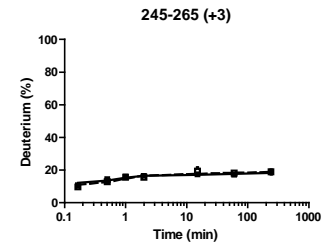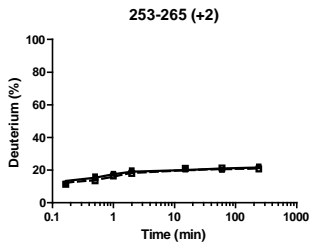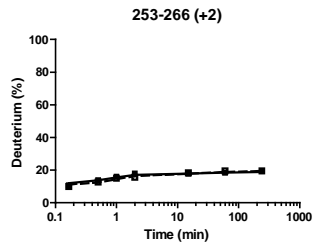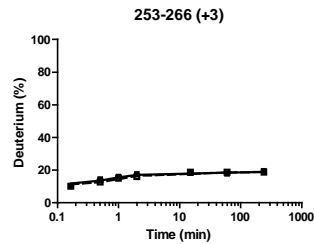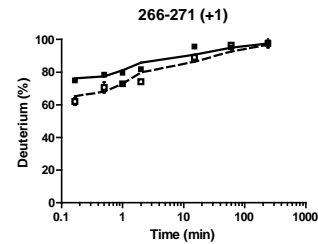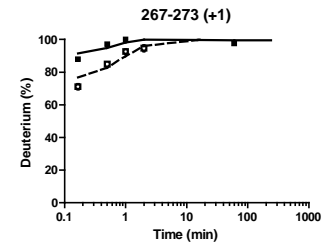

■ Apo

■ E3330 bound

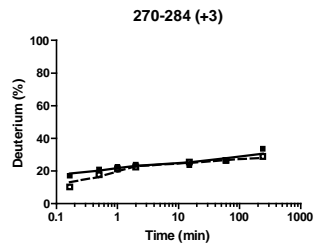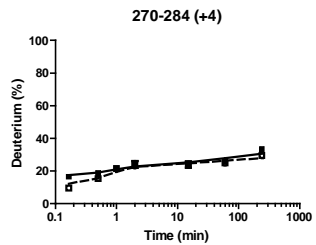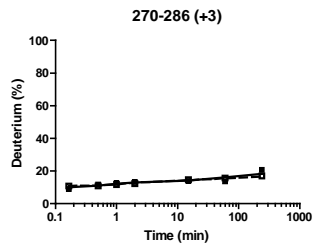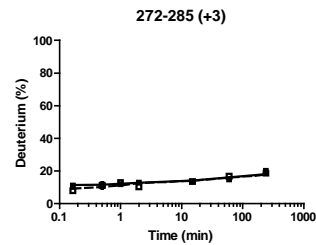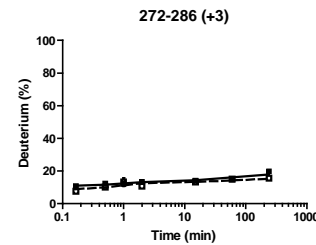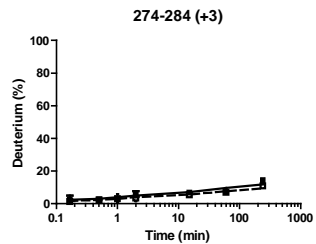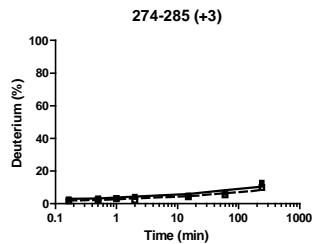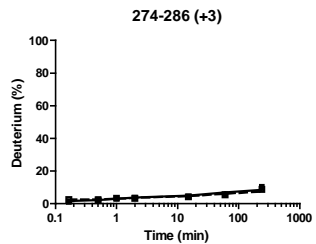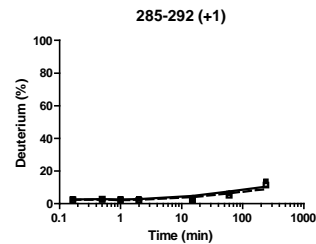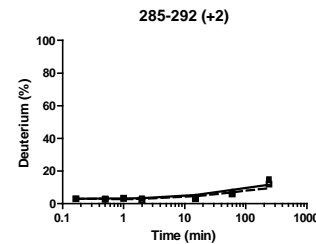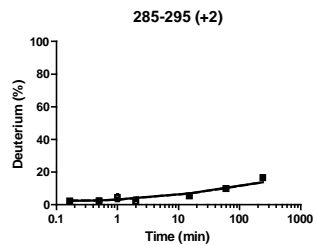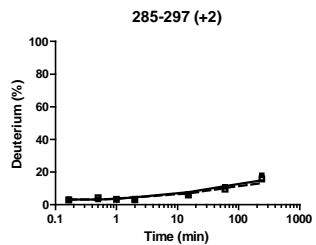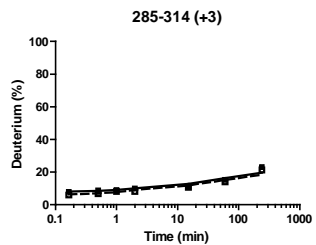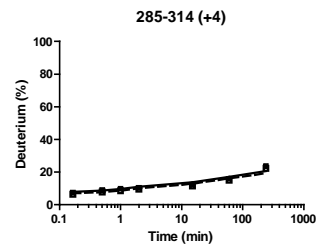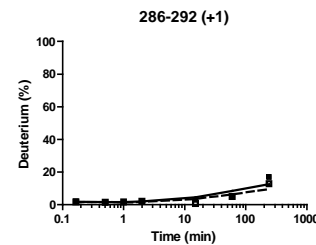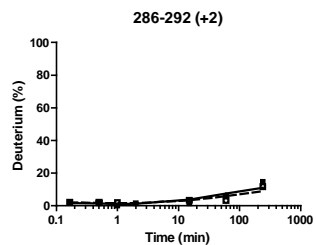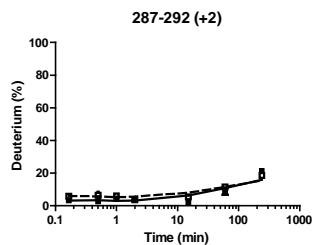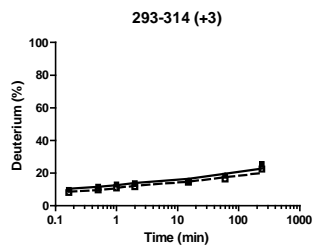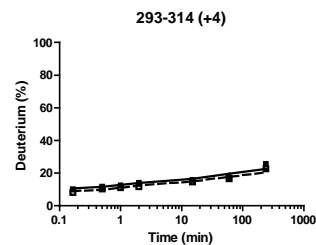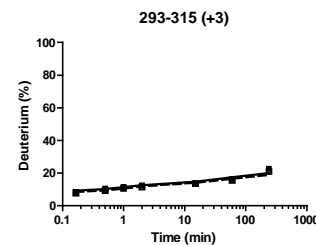

■ Apo      ■ E3330 bound

293-315 (+4)

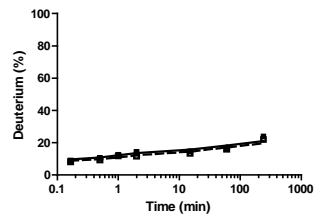

■ Apo

■ E3330 bound

# SI Figure S2.

## A.

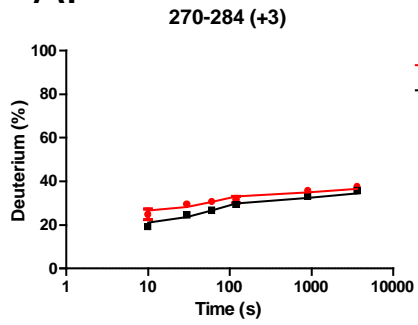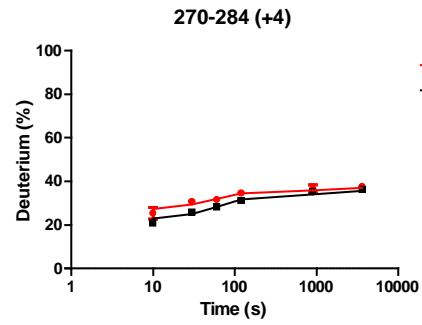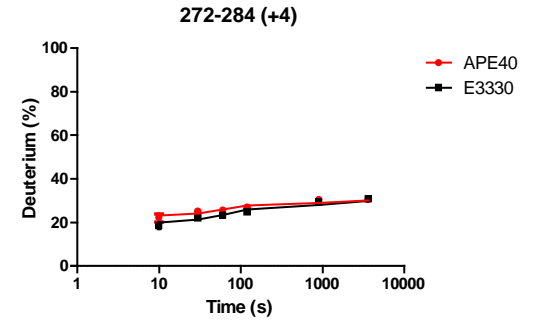

## B.

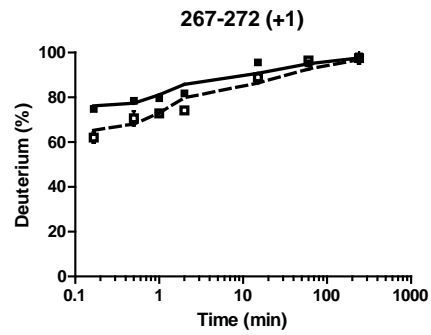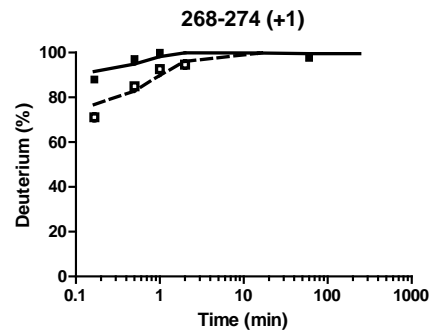

C.

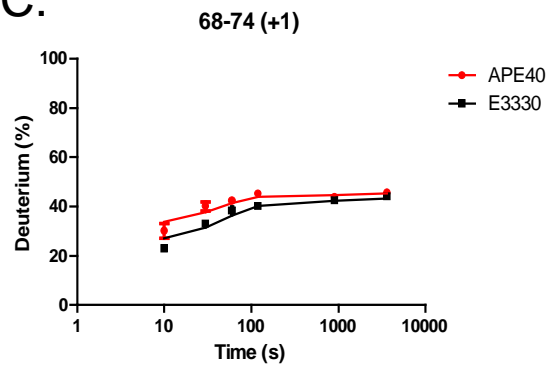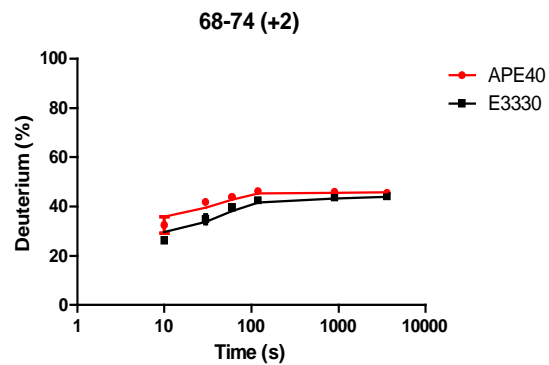

D.

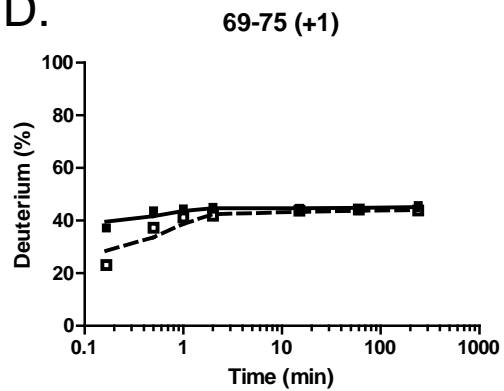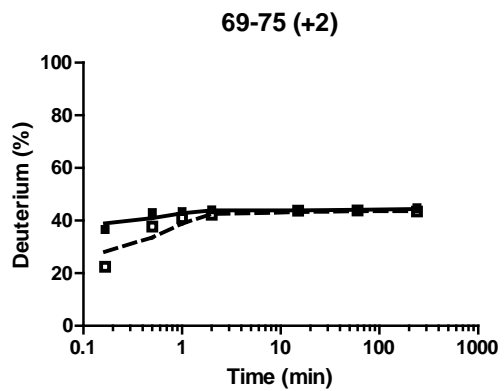



SI Figure S3.

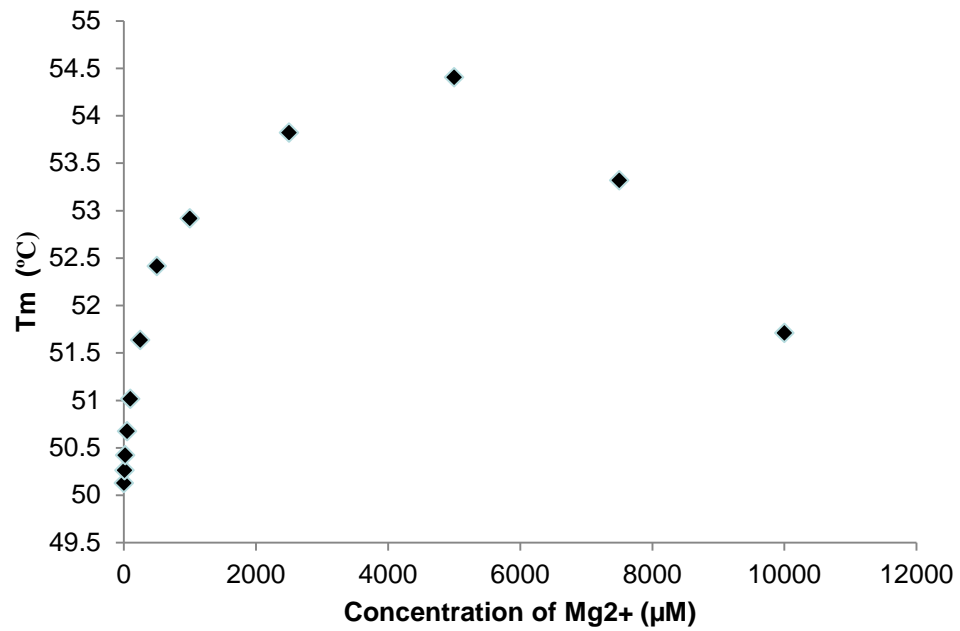

Supplement: NIHMS470505-supplement-2_si_002.pdf [file NIHMS470505-supplement-2_si_002.pdf]
