# Supplementary material
Source: PubMed Central journal article supplement (PMC3706204)
Supplement: NIHMS470505-supplement-1_si_001.pdf [file NIHMS470505-supplement-1_si_001.pdf]

## Supporting Information

**Figure S1.** Peptide data are shown for the HDX experiment described in the Experimental Procedures including APE1 along with APE1 incubated with 1.6 mM E3330. Apo refers to full-length APE1 alone, E3330 to the sample of APE1 incubated with E3330. Peptide coverage for the experiment was greater than 90%. Four peptides were identified with differences in HDX including 68-74 (seen for both the +1/+2 peptides), 266-271, and 267-273.

**Figure S2.** Peptide data are shown for HDX performed at 25  $\mu$ M E3330 (A and C) and similar peptides obtained from the experiment performed by using 1.6 mM E3330 (B and D). See Experimental Procedures for description of full-length APE1 experiments. Differential, solution phase HDX experiments were performed to detect the conformational change of  $\Delta$ 40 APE1, an N-terminally truncated form lacking the N-terminal 40 amino acids, induced by E3330 binding as previously described (1).  $\Delta$ 40 APE1 was incubated with E3330 at a ratio of 1:10 for at least 1 h on ice before HDX analysis. Each exchange reaction was initiated by incubating 2  $\mu$ L of 25  $\mu$ M protein (with or without 250  $\mu$ M E3330) with 18  $\mu$ L of D<sub>2</sub>O protein buffer for a predetermined time (10, 30, 60, 120, 900, and 3600 s) at 4 °C. The exchange reaction was quenched by mixing with 30  $\mu$ L of 3 M urea, 1% TFA at 1 °C. The mixture was passed across custom-packed pepsin column (2 mm X 2 cm) at 200  $\mu$ L/min, and the digested peptides were captured on a 2 mm X 1 cm C<sub>8</sub> trap column (Agilent) and desalted (total time for digestion and desalting was 3 min). Peptides were then separated across a 2.1 mm X 5 cm C<sub>18</sub> column (1.9  $\mu$  Hypersil Gold, Thermo Scientific) with a linear gradient of 4%–40% CH<sub>3</sub>CN, 0.1% formic acid, over 5 min. Protein digestion and peptide separation were performed on columns immersed in an ice-water bath to reduce D/H back exchange. Mass spectrometric analyses were carried out with capillary

temperature at 225 °C, and data were acquired with a measured mass resolving power of 100,000 at  $m/z$  400. Three replicates were performed for each ion-exchange time point. Under the conditions of this experiment accepting a  $K_d$  for binding of E3330 to APE1 of 390  $\mu\text{M}$ , we expect approximately 8% complex formation. Peptides were identified and HDX data processed as described in the Experimental Procedures.

**Figure S3.** Differential scanning fluorimetry analysis of the effect of  $\text{Mg}^{2+}$  on the melting temperature of APE1. A concentration range of 10  $\mu\text{M}$  – 10 mM  $\text{MgCl}_2$  was used to determine the effect of  $\text{Mg}^{2+}$  on the melting temperature of APE1. Concentrations of 10  $\mu\text{M}$  – 5 mM increased the melting temperature of APE1 by 4.3 °C maximally. However, addition of higher concentrations of  $\text{Mg}^{2+}$  resulted in a lower melting temperature than that obtained for 5 mM.

## References

1. Zhang, J., Chalmers, M. J., Stayrook, K. R., Burris, L. L., Garcia-Ordonez, R. D., Pascal, B. D., Burris, T. P., Dodge, J. A., and Griffin, P. R. (2010) Hydrogen/deuterium exchange reveals distinct agonist/partial agonist receptor dynamics within vitamin D receptor/retinoid X receptor heterodimer, *Structure* 18, 1332-1341.
